# Supplementary material for: Phylogeny and biogeography of the algal DMS-releasing enzyme in the global ocean
Source: PubMed Central journal article supplement (PMC10349084; doi:10.1038/s43705-023-00280-2), 2023-07-14
Supplement: 43705_2023_280_MOESM1_ESM.pdf [file 43705_2023_280_MOESM1_ESM.pdf]

## Supplementary Information

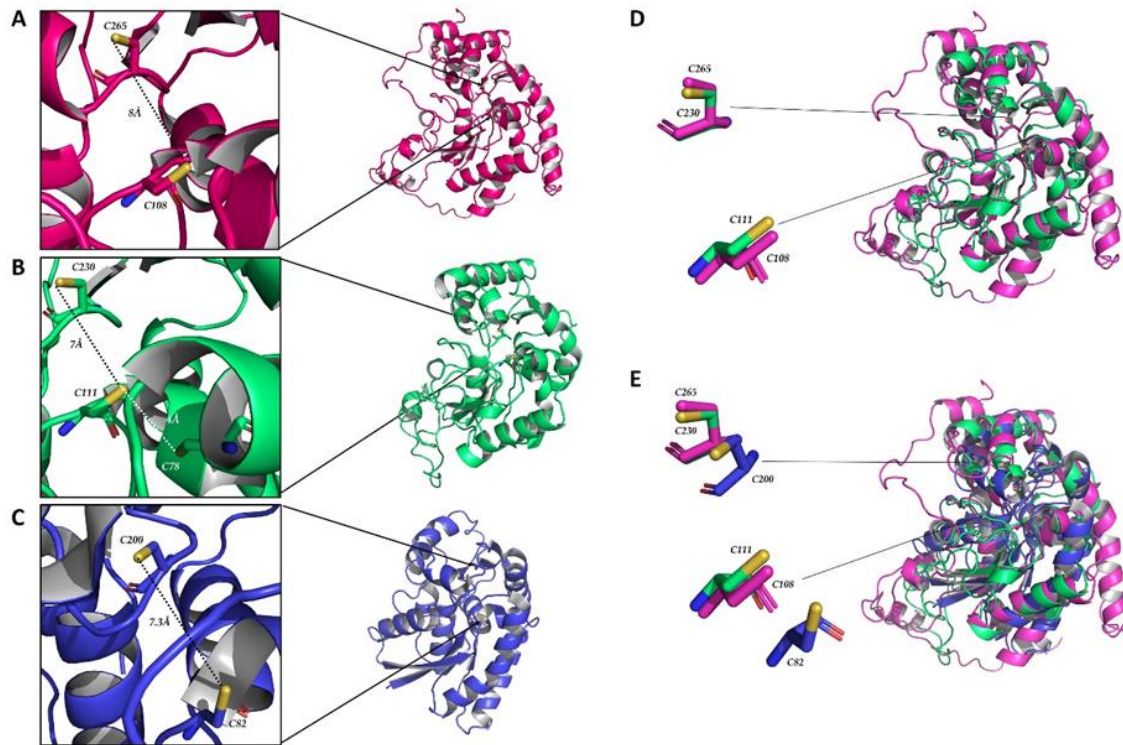

**Fig. S1.** Ribbon representation of the Alma1, Sym-Alma and bacterial Maleate Isomerase protein structures. (A-C) Predicted structure of two eukaryotic DMSP lyase proteins, Alma1 from *E. huxleyi* (A), and Sym-Alma from *Symbiodinium* A1 (B), as well as the known structure of bacterial Maleate Isomerase Iso (PDB:4FQ7) from *Pseudomonas putida* S16 (C). Insets show zoom-in view of the active site area in the DMSP lyases, where the canonical cysteines are shown as sticks: Cys108 and Cys265 for Alma1 (A) and Cys111 and Cys230 for Sym-Alma (B). (D-E) Structural alignment of Alma1 (pink) and Sym-Alma (green) (D) and Alma1, Sym-Alma and 4FQ7 (blue, E). Note that the cysteines residues of the eukaryotic homologs align perfectly, while the bacterial cysteines are not placed in the same position.

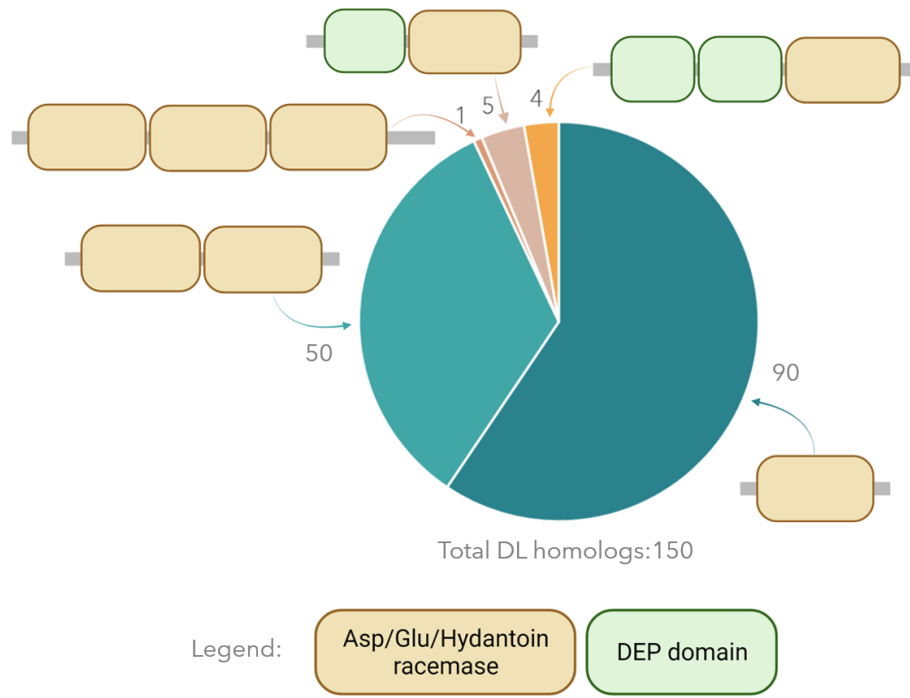

**Fig. S2. Conserved domain organization of eukaryotic DL homologs.** A schematic description of the different conserved domains (according to the CDD database) identified in a total of 150 DL homologs (see also dataset S1).

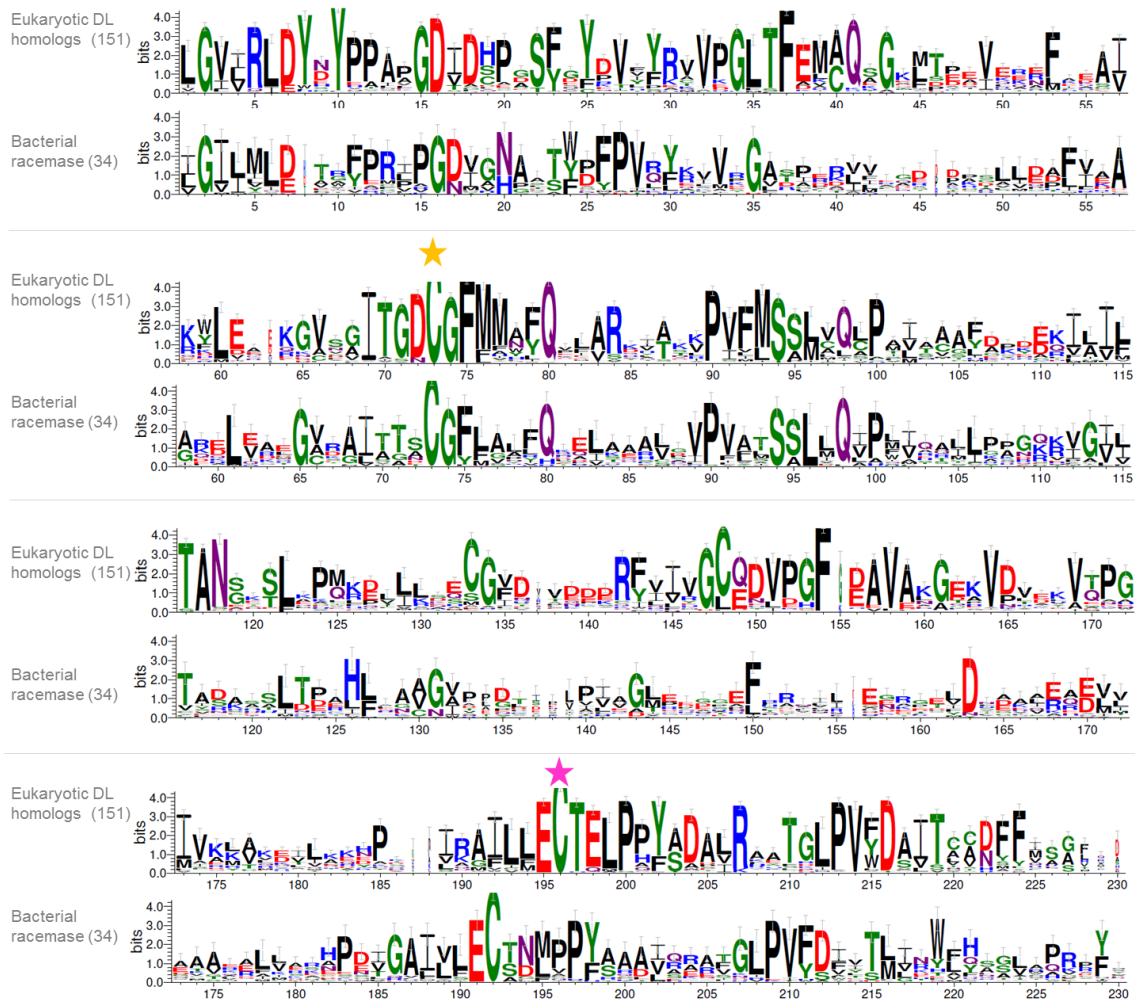

**Fig. S3. Sequence logos of multiple sequence alignment of the racemase domain from bacteria and eukaryotic DL homologs.** A total of 151 eukaryotic DL homologs were aligned (see dataset S1), and 34 bacterial sequences belong to the CDD subfamily PRK0747 (which is the closest to the Asp/Glu/Hydantoin racemase domain). Stars designate the first (yellow) and second (pink) canonical cysteine residues located at the active site of the DL enzyme.

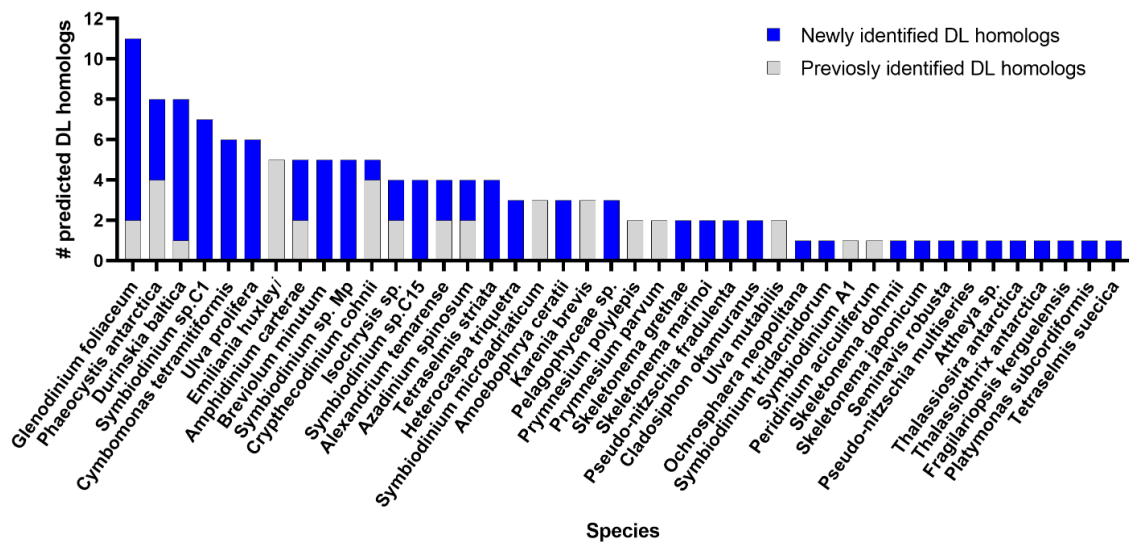

**Fig. S4. Predicted DL homologs in different phytoplankton species.** The number of predicted DL homologs is plotted per species.

**Taxonomic groups:**

- Bacteria
- Dinoflagellates
- Haptophytes
- Phaeophyceae & Pelagophyceae
- Diatoms
- Chlorophytes
- Scleractinia

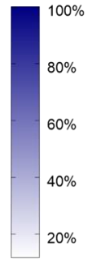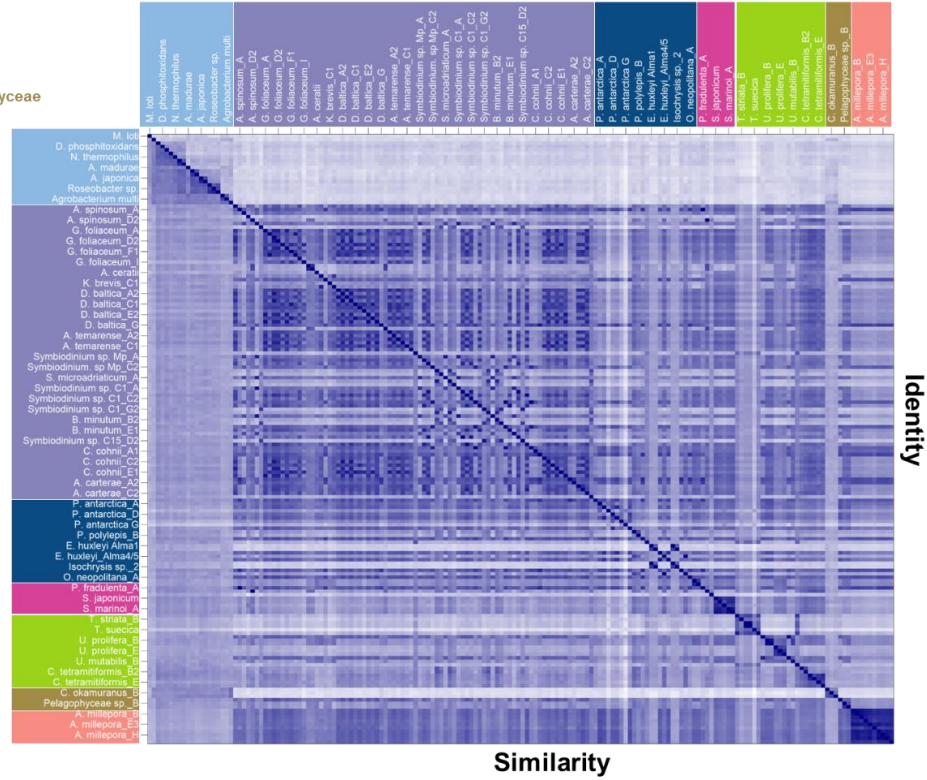

**Fig. S5. Sequence similarity and identity of bacterial and eukaryotic DL homologs.** The plot shows the sequence similarity scores below the diagonal and sequence identity scores above, for multiple sequence alignment of racemase domain of 174 DL homologs. Each row and column represent a DL homolog (see dataset S1). Due to space limitation, only third of the names could be presented. The sequences are orders according to their taxonomy (see legend).

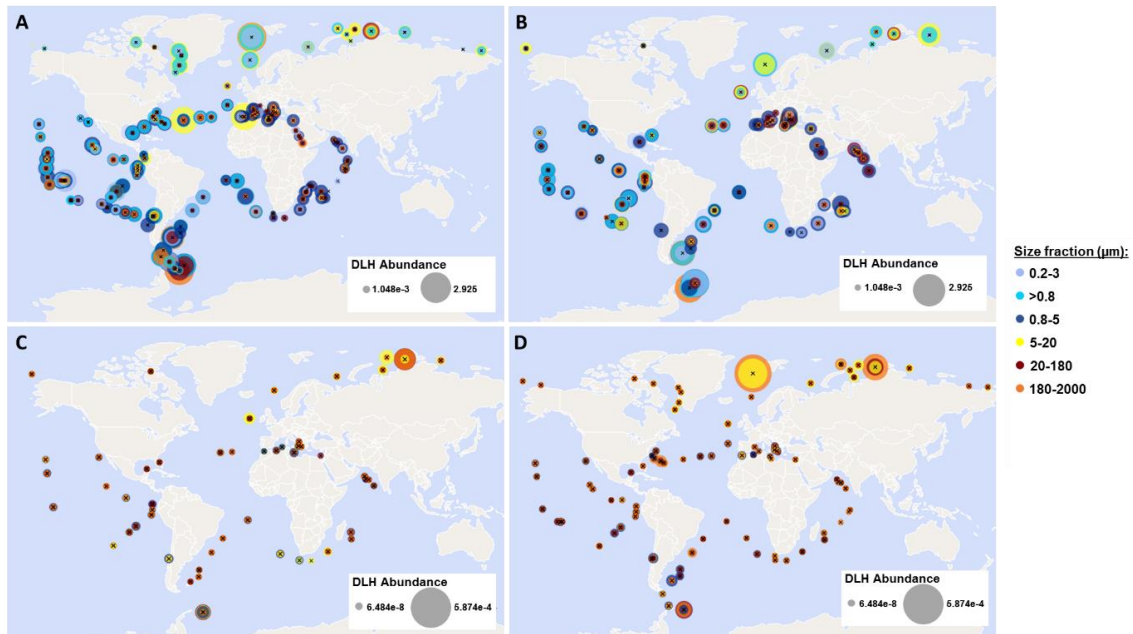

**Fig. S6. Abundance of DMS lyase homologs (DLHs) in the oceans.** Geographic distribution of DLHs in phytoplankton found in *Tara* Oceans metagenomes (A,B) and metatranscriptomes (C,D) datasets. Color depicts the size fraction of each sample. The circle size is proportional to the relative abundance of DLH genes or transcripts, which was normalized as percent of mapped reads.

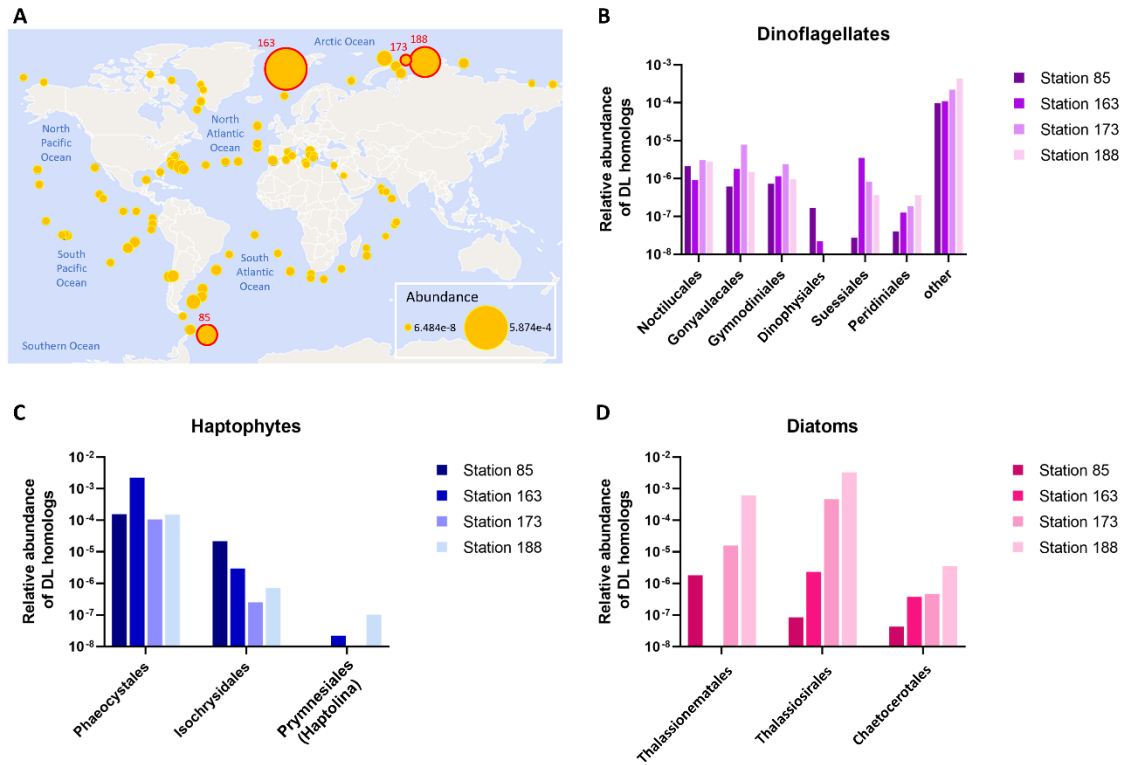

**Fig. S7. Taxonomy of phytoplankton in selected *Tara* stations with high DL-homologs expression.** (A). Location of stations *Tara* 85, 163, 173 and 188. The circle size is proportional to the relative abundance of DLH transcripts, which was normalized as percent of mapped reads. (B-D) Identified dinoflagellates, haptophytes and diatoms orders in each station.

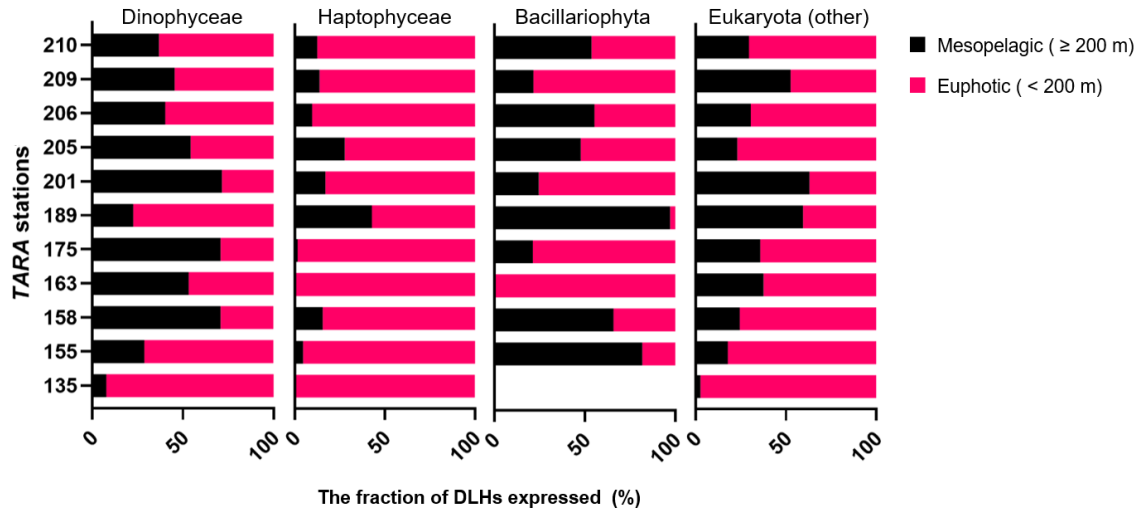

**Fig. S8. Expression of DLHs in the euphotic versus mesopelagic zones in the *Tara Ocean* dataset.** DLHs (DMSP lyase homologs) were detected in mesopelagic depths (200-751 m) in 11 stations (Y axis). The fraction of DLH transcripts expressed in the mesopelagic (black) and euphotic (pink) zone is presented for the main DLHs-expressing taxa.



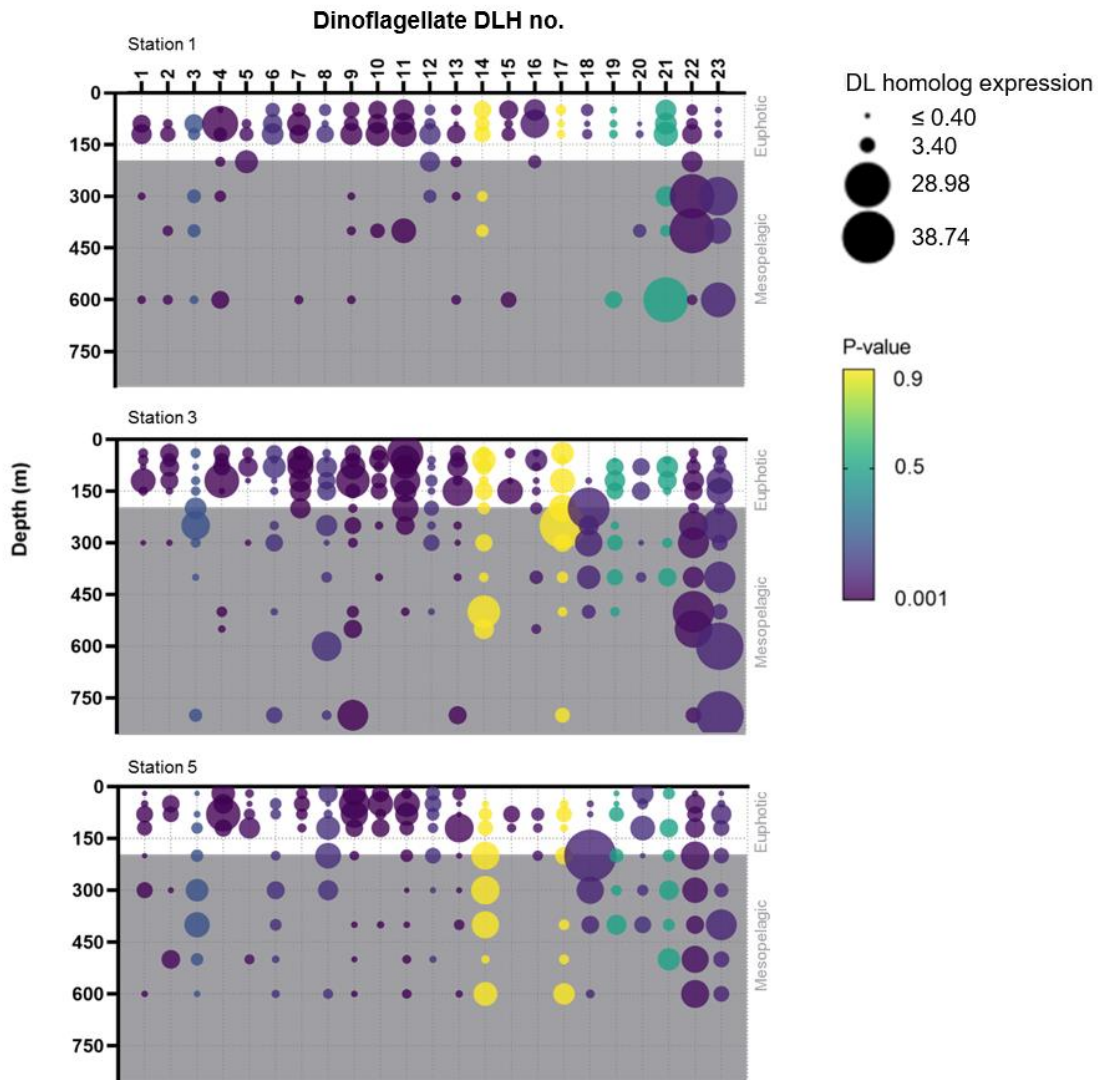

**Fig. S9. Dinoflagellate DLHs are differentially expressed in euphotic and mesopelagic depths in the central Pacific Ocean.** The expression level of 23 DLHs from natural dinoflagellates population is presented for three different locations (stations 1, 3, 5) in the central Pacific Ocean. Each station contains a depth profile. The circle size represents the normalized expression level. The color depicts the P - value, showing how significantly different is the expression between the euphotic (white background) and the mesopelagic (grey background) zones. The expression data was taken from Cohen NR, et al. (2021).

**Table S1. Conserved motifs in the DL protein sequence.**

| Motif          | P-value  | E-value  | Sites          | Training set-positives | Training set-negatives | Score     | Testing set-positives | Testing set-negatives | P-value  | Match Threshold |
|----------------|----------|----------|----------------|------------------------|------------------------|-----------|-----------------------|-----------------------|----------|-----------------|
| GCZDVPGFD      | 1.40E-16 | 4.10E-15 | 145<br>(96.0%) | 131 / 136<br>(96.3%)   | 0 / 826<br>(0.0%)      | 5.20E-157 | 14 / 15<br>(93.3%)    | 0 / 91<br>(0.0%)      | 1.40E-16 | 7.54392         |
| GDCGFMMAFQ     | 6.60E-15 | 1.90E-13 | 149<br>(98.7%) | 136 / 136<br>(100.0%)  | 0 / 826<br>(0.0%)      | 1.60E-169 | 13 / 15<br>(86.7%)    | 0 / 91<br>(0.0%)      | 6.60E-15 | 25.5612         |
| IRAILLECTEL    | 6.60E-15 | 1.90E-13 | 148<br>(98.0%) | 135 / 136<br>(99.3%)   | 0 / 826<br>(0.0%)      | 1.30E-166 | 13 / 15<br>(86.7%)    | 0 / 91<br>(0.0%)      | 6.60E-15 | 25.6013         |
| EAKGVSGIT      | 6.60E-15 | 1.90E-13 | 126<br>(83.4%) | 113 / 136<br>(83.1%)   | 3 / 826<br>(0.4%)      | 2.50E-119 | 13 / 15<br>(86.7%)    | 0 / 91<br>(0.0%)      | 6.60E-15 | 11.3761         |
| RVVPGLTFEMAQSG | 2.10E-13 | 6.00E-12 | 144<br>(95.4%) | 132 / 136<br>(97.1%)   | 0 / 826<br>(0.0%)      | 3.20E-159 | 12 / 15<br>(80.0%)    | 0 / 91<br>(0.0%)      | 2.10E-13 | 16.3706         |
| GVIRLDYBY      | 2.10E-13 | 6.00E-12 | 143<br>(94.7%) | 131 / 136<br>(96.3%)   | 0 / 826<br>(0.0%)      | 5.20E-157 | 12 / 15<br>(80.0%)    | 0 / 91<br>(0.0%)      | 2.10E-13 | 15.5877         |
| RAATGLPVFDAI   | 2.10E-13 | 6.00E-12 | 143<br>(94.7%) | 131 / 136<br>(96.3%)   | 0 / 826<br>(0.0%)      | 5.20E-157 | 12 / 15<br>(80.0%)    | 0 / 91<br>(0.0%)      | 2.10E-13 | 20.2413         |
| GDIDHPGSFGY    | 2.10E-13 | 6.00E-12 | 144<br>(95.4%) | 132 / 136<br>(97.1%)   | 2 / 826<br>(0.2%)      | 2.80E-155 | 12 / 15<br>(80.0%)    | 0 / 91<br>(0.0%)      | 2.10E-13 | 21.5522         |
| ILTANSKSLKP    | 6.70E-13 | 1.90E-11 | 147<br>(97.4%) | 134 / 136<br>(98.5%)   | 0 / 826<br>(0.0%)      | 5.50E-164 | 13 / 15<br>(86.7%)    | 2 / 91<br>(2.2%)      | 6.70E-13 | 16.4622         |
| PPYADAL        | 6.70E-13 | 1.90E-11 | 132<br>(87.4%) | 119 / 136<br>(87.5%)   | 10 / 826<br>(1.2%)     | 4.20E-120 | 13 / 15<br>(86.7%)    | 2 / 91<br>(2.2%)      | 6.70E-13 | 13.6881         |

**Table S2. DL homologs identified by Alcolombri et al., (2015).** The WP accessions are from NCBI and the CAMPEP accessions are from the MMETSP databases.

| Species                                | Domain    | Phylum         | Name in tree- Fig. 4a from Alcolombri et al., 2015 | Accession number  |
|----------------------------------------|-----------|----------------|----------------------------------------------------|-------------------|
| Paraburkholderia ferrariae             | Bacteria  | Proteobacteria | P. ferrariae                                       | WP_028225891.1    |
| Streptosporangium roseum               | Bacteria  | Actinobacteria | S. roseum                                          | WP_051865922.1    |
| Robbsia andropogonis                   | Bacteria  | Proteobacteria | R. andropogonis                                    | WP_024904647.1    |
| Geopsychrobacter electrodiphilus       | Bacteria  | Proteobacteria | G. electrodiphilus                                 | WP_020674609.1    |
| Azospirillum lipoferum                 | Bacteria  | Proteobacteria | A. lipoferum                                       | WP_042444357.1    |
| Pseudovibrio sp. FO-BEG1               | Bacteria  | Proteobacteria | Pseudovibrio sp.                                   | WP_014285483.1    |
| Micromonospora sp. ATCC 39149          | Bacteria  | Actinomycetia  | Micromonospora sp.                                 | WP_007071402.1    |
| Agrobacterium (Multispecies)           | Bacteria  | Proteobacteria | Agrobacterium multi                                | WP_007689264.1    |
| Mesorhizobium loti                     | Bacteria  | Proteobacteria | M. loti                                            | WP_019863393.1    |
| Actinomadura madurae                   | Bacteria  | Actinobacteria | A. madurae                                         | WP_063747721.1    |
| Amphritea japonica                     | Bacteria  | Proteobacteria | A. japonica                                        | WP_019621467.1    |
| Desulfotignum phosphitoxidans          | Bacteria  | Proteobacteria | D. phosphitoxidans                                 | WP_006965703.1    |
| Roseobacter sp. SK209-2-6              | Bacteria  | Proteobacteria | Roseobacter sp.                                    | WP_008209391.1    |
| unclassified Leisingera (Multispecies) | Bacteria  | Proteobacteria | Leisingera multi                                   | WP_019296982.1    |
| Alkalihalobacillus wakoensis           | Bacteria  | Firmicutes     | A. wakoensis                                       | WP_034745099.1    |
| Natranaerobius thermophilus            | Bacteria  | Firmicutes     | N. thermophilus                                    | WP_012448288.1    |
| Desulfatirhabdium butyrivorans         | Bacteria  | Proteobacteria | D. butyrivorans                                    | WP_028324949.1    |
| Acetomicrobium hydrogeniformans        | Bacteria  | Synergistetes  | A. hydrogeniformans                                | WP_009200906.1    |
| Neptuniibacter caesariensis            | Bacteria  | Proteobacteria | N. caesariensis                                    | WP_007022653.1    |
| Agrobacterium rhizogenes               | Bacteria  | Proteobacteria | A. rhizogenes                                      | WP_047469519.1    |
| Candidatus Puniceispirillum marinum    | Bacteria  | Proteobacteria | C.P. marinum                                       | WP_013045355.1    |
| Cryptocodinium cohnii (Seligo)         | Eukaryota | Dinoflagellata | C. cohnii A                                        | CAMPEP_0193854358 |
| Cryptocodinium cohnii (Seligo)         | Eukaryota | Dinoflagellata | C. cohnii B                                        | CAMPEP_0193926808 |
| Cryptocodinium cohnii (Seligo)         | Eukaryota | Dinoflagellata | C. cohnii C                                        | CAMPEP_0193865556 |
| Cryptocodinium cohnii (Seligo)         | Eukaryota | Dinoflagellata | C. cohnii D                                        | CAMPEP_0193933962 |
| Azadinium spinosum 3D9                 | Eukaryota | Dinoflagellata | A. spinosum A                                      | CAMPEP_0186837182 |
| Azadinium spinosum 3D9                 | Eukaryota | Dinoflagellata | A. spinosum B                                      | CAMPEP_0186768496 |
| Karenia brevis CCMP2299                | Eukaryota | Dinoflagellata | K. brevis A                                        | CAMPEP_0188921804 |
| Karenia brevis CCMP2299                | Eukaryota | Dinoflagellata | K. brevis B                                        | CAMPEP_0188855392 |
| Karenia brevis CCMP2299                | Eukaryota | Dinoflagellata | K. brevis C                                        | CAMPEP_0188922230 |
| Alexandrium temarense CCMP1771         | Eukaryota | Dinoflagellata | A. temarense A                                     | CAMPEP_0186397762 |
| Alexandrium temarense CCMP1771         | Eukaryota | Dinoflagellata | A. temarense B                                     | CAMPEP_0186178466 |
| Peridinium aciculiferum PAER_2         | Eukaryota | Dinoflagellata | P. aciculiferum                                    | CAMPEP_0190608078 |
| Durinskia baltica CSIRO_CS-38          | Eukaryota | Dinoflagellata | D. baltica                                         | CAMPEP_0200062214 |
| Amphidinium carterae CCMP1314          | Eukaryota | Dinoflagellata | A. carterae A                                      | CAMPEP_0186439658 |
| Amphidinium carterae CCMP1314          | Eukaryota | Dinoflagellata | A. carterae B                                      | CAMPEP_0186460378 |
| Glenodinium foliaceum CCAP1116         | Eukaryota | Dinoflagellata | G. foliaceum A                                     | CAMPEP_0188240084 |
| Glenodinium foliaceum CCAP1116         | Eukaryota | Dinoflagellata | G. foliaceum B                                     | CAMPEP_0188434408 |
| Isochrysis sp.                         | Eukaryota | Haptophyta     | Isochrysis sp. A                                   | CAMPEP_0188750792 |
| Isochrysis sp.                         | Eukaryota | Haptophyta     | Isochrysis sp. B                                   | CAMPEP_0188739558 |
| Prymnesium parvum Texoma               | Eukaryota | Haptophyta     | P. parvum A                                        | CAMPEP_0191203590 |
| Prymnesium parvum Texoma               | Eukaryota | Haptophyta     | P. parvum B                                        | CAMPEP_0191252250 |

**Table S3. Confirmation of DL homologs expression in the MMETSP database.**

| Species                                        | MMETSP Sample IDs                                                | Contigs                                            | Expression ?                   |
|------------------------------------------------|------------------------------------------------------------------|----------------------------------------------------|--------------------------------|
| <i>P. aciculiferum</i>                         | MMETSP0370,<br>MMETSP0371                                        | Peridinium-aciculiferum-PAER_2-20130926 2150_0     | yes                            |
| <i>G. foliaceum</i>                            | MMETSP0118_2,<br>MMETSP0119_2                                    | Glenodinium-foliaceum-CCAP1116_3-20130913 6335_1   | yes                            |
|                                                |                                                                  | Glenodinium-foliaceum-CCAP1116_3-20130913 269394_1 | yes                            |
|                                                |                                                                  | Glenodinium-foliaceum-CCAP1116_3-20130913 39119_1  | yes                            |
|                                                |                                                                  | Glenodinium-foliaceum-CCAP1116_3-20130913 264918_1 | yes                            |
|                                                |                                                                  | Glenodinium-foliaceum-CCAP1116_3-20130913 265187_1 | yes                            |
|                                                |                                                                  | Glenodinium-foliaceum-CCAP1116_3-20130913 162165_1 | yes                            |
|                                                |                                                                  | Glenodinium-foliaceum-CCAP1116_3-20130913 11173_1  | yes                            |
| <i>S. kawagutii</i>                            | MMETSP0132_2C,<br>MMETSP0133_2,<br>MMETSP0134_2,<br>MMETSP0135_2 | Symbiodinium-kawagutii-CCMP2468-20131203 3329_1    | no                             |
|                                                |                                                                  |                                                    |                                |
| <i>Symbiodinium-sp-C15</i>                     | MMETSP1370,<br>MMETSP1371                                        | Symbiodinium-sp-C15-20130923 6074_1                | yes                            |
|                                                |                                                                  | Symbiodinium-sp-C15-20130923 119450_1              | yes                            |
|                                                |                                                                  | Symbiodinium-sp-C15-20130923 60114_1               | yes                            |
|                                                |                                                                  | Symbiodinium-sp-C15-20130923 18175_1               | yes                            |
|                                                |                                                                  | Symbiodinium-sp-C15-20130923 25623_1               | yes                            |
| <i>Symbiodinium-sp-Mp</i>                      | MMETSP1122,<br>MMETSP1123,<br>MMETSP1124,<br>MMETSP1125          | Symbiodinium-sp-Mp-20130822 28546_1                | yes                            |
|                                                |                                                                  | Symbiodinium-sp-Mp-20130822 90026_1                | yes                            |
|                                                |                                                                  | Symbiodinium-sp-Mp-20130822 7847_1                 | yes                            |
|                                                |                                                                  | Symbiodinium-sp-Mp-20130822 75336_1                | yes                            |
|                                                |                                                                  | Symbiodinium-sp-Mp-20130822 189624_1               | yes                            |
| <i>Symbiodinium-sp-C1</i>                      | MMETSP1367,<br>MMETSP1369                                        | Symbiodinium-sp-C1-20140214 19746_1                | yes                            |
|                                                |                                                                  | Symbiodinium-sp-C1-20140214 27762_1                | yes                            |
|                                                |                                                                  | Symbiodinium-sp-C1-20140214 794_1                  | yes                            |
|                                                |                                                                  | Symbiodinium-sp-C1-20140214 25073_1                | yes                            |
|                                                |                                                                  | Symbiodinium-sp-C1-20140214 27039_1                | yes                            |
| <i>K. brevis</i>                               | MMETSP0027,<br>MMETSP0029,<br>MMETSP0030                         | Karenia-brevis-CCMP2229-20130916 56488_1           | yes                            |
|                                                |                                                                  | Karenia-brevis-CCMP2229-20130916 7473_1            | yes                            |
|                                                |                                                                  | Karenia-brevis-CCMP2229-20130916 56810_1           | yes                            |
| <i>A. carterae</i>                             | MMETSP0398C,<br>MMETSP0399,<br>MMETSP0258,<br>MMETSP0259         | Amphidinium-carterae-CCMP1314-20130924 22079_1     | yes                            |
|                                                |                                                                  | Amphidinium-carterae-CCMP1314-20130924 63059_1     | yes, except MMETSP0399         |
|                                                |                                                                  | Amphidinium-carterae-CCMP1314-20130924 57390_1     | only in MMETSP0258, MMETSP0259 |
|                                                |                                                                  | Amphidinium-carterae-CCMP1314-20130924 23864_1     | yes                            |
| <i>C. cohnii</i>                               | MMETSP0323_2,<br>MMETSP0324_2,<br>MMETSP0325_2,<br>MMETSP0326_2  | Cryptecodinium-cohnii-Seligo-20130904 11054_1      | yes                            |
|                                                |                                                                  | Cryptecodinium-cohnii-Seligo-20130904 174461_1     | yes                            |
|                                                |                                                                  | Cryptecodinium-cohnii-Seligo-20130904 19770_1      | yes                            |
|                                                |                                                                  | Cryptecodinium-cohnii-Seligo-20130904 195906_1     | yes, except MMETSP0323_2       |
|                                                |                                                                  | Cryptecodinium-cohnii-Seligo-20130904 20414_1      | yes                            |
| <i>A. spinosum</i>                             | MMETSP1036_2,<br>MMETSP1037_2,<br>MMETSP1038_2                   | Azadinium-spinosum-3D9-20130829 183522_1           | yes                            |
|                                                |                                                                  | Azadinium-spinosum-3D9-20130829 29318_1            | yes                            |
|                                                |                                                                  | Azadinium-spinosum-3D9-20130829 17069_1            | yes                            |
|                                                |                                                                  | Azadinium-spinosum-3D9-20130829 21942_1            | yes                            |
| <i>D. baltica</i>                              | MMETSP0116_2,<br>MMETSP0117_2                                    | Durinskia-baltica-CSIRO_CS-38-20140214 203657_1    | no                             |
|                                                |                                                                  | Durinskia-baltica-CSIRO_CS-38-20140214 157896_1    | yes                            |
|                                                |                                                                  | Durinskia-baltica-CSIRO_CS-38-20140214 5581_1      | yes                            |
|                                                |                                                                  | Durinskia-baltica-CSIRO_CS-38-20140214 164224_1    | yes                            |
|                                                |                                                                  | Durinskia-baltica-CSIRO_CS-38-20140214 160103_1    | yes                            |
|                                                |                                                                  | Durinskia-baltica-CSIRO_CS-38-20140214 157677_1    | yes                            |
|                                                |                                                                  | Durinskia-baltica-CSIRO_CS-38-20140214 238428_1    | yes                            |
|                                                |                                                                  | Durinskia-baltica-CSIRO_CS-38-20140214 230672_1    | yes                            |
|                                                |                                                                  | Durinskia-baltica-CSIRO_CS-38-20140214 6229_1      | yes                            |
|                                                |                                                                  | Durinskia-baltica-CSIRO_CS-38-20140214 209311_1    | only in MMETSP0117_2           |
|                                                |                                                                  | Durinskia-baltica-CSIRO_CS-38-20140214 151706_1    | yes                            |
|                                                |                                                                  | Durinskia-baltica-CSIRO_CS-38-20140214 238089_1    | yes                            |
| Durinskia-baltica-CSIRO_CS-38-20140214 14482_1 | yes                                                              |                                                    |                                |
| <i>A. temarense</i>                            | MMETSP0378,<br>MMETSP0380,<br>MMETSP0382,<br>MMETSP0384          | Alexandrium-temarense-CCMP1771-20130823 410328_1   | yes                            |
|                                                |                                                                  | Alexandrium-temarense-CCMP1771-20130823 2738_1     | yes                            |
|                                                |                                                                  | Alexandrium-temarense-CCMP1771-20130823 37484_1    | yes                            |
|                                                |                                                                  | Alexandrium-temarense-CCMP1771-20130823 165856_1   | yes                            |

**Table S3- continue. Confirmation of DL homologs expression in the MMETSP database.**

|                              |                                                              |                                                      |                            |
|------------------------------|--------------------------------------------------------------|------------------------------------------------------|----------------------------|
| <i>Isochrysis</i> sp.        | MMETSP1388,<br>MMETSP1090                                    | Isochrysis-sp-CCMP1244-20130912 8451_1               | yes                        |
|                              |                                                              | Isochrysis-sp-CCMP1244-20130912 1392_1               | yes                        |
|                              |                                                              | Isochrysis-sp-CCMP1244-20130912 2246_1               | yes                        |
|                              |                                                              | Isochrysis-sp-CCMP1244-20130912 23305_1              | yes                        |
| <i>E. huxleyi</i><br>CCMP370 | MMETSP1154,<br>MMETSP1155,<br>MMETSP1156,<br>MMETSP1157      | Emiliana-huxleyi-CCMP370-20130905 29607_1            | yes                        |
|                              |                                                              |                                                      |                            |
| <i>E. huxleyi</i><br>PLYM219 | MMETSP1150,<br>MMETSP1151,<br>MMETSP1152,<br>MMETSP1153      | Emiliana-huxleyi-PLYM219-20130905 8612_1             | yes                        |
|                              |                                                              | Emiliana-huxleyi-PLYM219-20130905 91030_1            | yes                        |
| <i>E. huxleyi</i><br>CCMP379 | MMETSP0994,<br>MMETSP0995,<br>MMETSP0996,<br>MMETSP0997      | Emiliana-huxleyi-379-20130905 8113_1                 | yes                        |
|                              |                                                              | Emiliana-huxleyi-379-20130905 18426_1                | yes                        |
| <i>C. polylepis</i>          | MMETSP0143,<br>MMETSP0145,                                   | Chrysochromulina-polylepis-CCMP1757-20130903 18714_1 | yes                        |
| <i>P. parvum texoma</i>      | MMETSP0006_2,<br>MMETSP0007,<br>MMETSP0008_2,<br>MMETSP0814, | Prymnesium-parvum-Texoma1-20131001 4355_1            | yes                        |
|                              |                                                              | Prymnesium-parvum-Texoma1-20131001 104153_1          | yes                        |
|                              |                                                              | Prymnesium-parvum-Texoma1-20131001 200449_1          | yes                        |
|                              |                                                              | Prymnesium-parvum-Texoma1-20131001 21691_1           | yes                        |
| <i>S. marinoi</i>            | MMETSP0918,<br>MMETSP0920                                    | Skeletonema-marinoi-SkelA-20130924 7776_1            | yes                        |
| <i>S. dohmii</i>             | MMETSP0562,<br>MMETSP0563                                    | Skeletonema-dohmii-SkelB-20130926 18976_1            | yes                        |
| <i>P. fraudulenta</i> *      | MMETSP0850,<br>MMETSP0851,                                   | Pseudo_nitzschia-fraudulenta-WWA7-20140214 209615_1  | only in MMETSP0851         |
|                              |                                                              | Pseudo_nitzschia-fraudulenta-WWA7-20140214 96008_1   | only in MMETSP0851         |
| <i>T. antarctica</i> *       | MMETSP0902,<br>MMETSP0903,                                   | Thalassiosira-antarctica-CCMP982-20140214 20162_1    | yes                        |
| <i>Tx. antarctica</i> *      | MMETSP0152,<br>MMETSP0154                                    | Thalassiothrix-antarctica-L6_D1-20140214 17297_1     | yes                        |
| <i>F. kerguelensis</i> *     | MMETSP0906,<br>MMETSP0907,<br>MMETSP0908<br>MMETSP0909       | Fragilariopsis-kerguelensis-L2_C3-20140214 35188_1   | yes                        |
| <i>T. striata</i>            | MMETSP0817,<br>MMETSP0818,<br>MMETSP0819,<br>MMETSP0820      | Tetraselmis-striata-LANL1001-20140214 2880_1         | yes                        |
|                              |                                                              | Tetraselmis-striata-LANL1001-20140214 11490_1        | yes                        |
|                              |                                                              | Tetraselmis-striata-LANL1001-20140214 18675_1        | yes, except in MME TSP0817 |
|                              |                                                              | Tetraselmis-striata-LANL1001-20140214 95585_1        | yes, except in MMETSP0817  |

\*Note: No genome was available for this species, the putative homolog was found in the MMETSP transcriptome data only.

**Table S4. Expression levels of identified DLHs under environmental stress conditions.**

| Species                           | DL homolog             | Experiment (stress condition tested) | DL expression - control | DL expression - stress condition tested | DL expression-<br>Fold change | Biological replicates          | Source                    |
|-----------------------------------|------------------------|--------------------------------------|-------------------------|-----------------------------------------|-------------------------------|--------------------------------|---------------------------|
| <i>Azadinium spinosum</i>         | Azadinium spinosum A   | Cold stress                          | 0                       | 2710                                    | -                             | 1                              | MMETSP                    |
|                                   | Azadinium spinosum B   | Cold stress                          | 203                     | 191                                     | 0.9                           | 1                              | MMETSP                    |
|                                   | Azadinium spinosum C   | Cold stress                          | 685                     | 702                                     | 1.0                           | 1                              | MMETSP                    |
|                                   | Azadinium spinosum D   | Cold stress                          | 1048                    | 1115                                    | 1.1                           | 1                              | MMETSP                    |
| <i>Amphidinium carterae</i>       | Amphidinium carterae A | High light                           | 12                      | 16                                      | 1.3                           | 1                              | MMETSP                    |
|                                   | Amphidinium carterae B | High light                           | 0                       | 0                                       | not expressed                 | 1                              | MMETSP                    |
|                                   | Amphidinium carterae C | High light                           | 0                       | 7                                       | -                             | 1                              | MMETSP                    |
|                                   | Amphidinium carterae D | High light                           | 196                     | 199                                     | 1.0                           | 1                              | MMETSP                    |
|                                   | Amphidinium carterae E | High light                           | 0                       | 0                                       | not expressed                 | 1                              | MMETSP                    |
| <i>Isochrysis</i>                 | Isochrysis sp. A       | High light                           | 334                     | 316                                     | 0.95                          | 1                              | MMETSP                    |
|                                   | Isochrysis sp. B       | High light                           | 194                     | 490                                     | 2.53                          | 1                              | MMETSP                    |
|                                   | Isochrysis sp. C       | High light                           | 89                      | 33865                                   | 382.46                        | 1                              | MMETSP                    |
|                                   | Isochrysis sp. D       | High light                           | 1597                    | 846                                     | 0.53                          | 1                              | MMETSP                    |
| <i>Thalassiosira antarctica</i>   | T. antarctica A        | Cold stress                          | 203                     | 399                                     | 1.97                          | control -2;<br>cold stress-1   | MMETSP                    |
|                                   | T. antarctica B        | Cold stress                          | 30                      | 18                                      | 0.59                          | control -2;<br>cold stress-1   | MMETSP                    |
| <i>Thalassiosira antarctica</i>   | T. antarctica A        | Si limitation                        | 440                     | 19                                      | 0.04                          | control -2; Si<br>limitation-1 | MMETSP                    |
|                                   | T. antarctica B        | Si limitation                        | 31                      | 0                                       | 0.00                          | control -2; Si<br>limitation-1 | MMETSP                    |
| <i>Pseudonitzschia fradulenta</i> | P. fradulenta A        | Si limitation                        | 0                       | 260                                     | -                             | 1                              | MMETSP                    |
|                                   | P. fradulenta B        | Si limitation                        | 0                       | 568                                     | -                             | 1                              | MMETSP                    |
| <i>Skeletonema dohmii</i>         | S. dohmii              | N limitation                         | 73                      | 11                                      | 0.15                          | 1                              | MMETSP                    |
| <i>Seminavis robusta</i>          | S. robusta             | N limitation (48 h)                  | 4                       | 2                                       | 0.54                          | 2                              | Osuna-Cruz et al., (2020) |
|                                   | S. robusta             | N limitation (72 h)                  | 10                      | 1                                       | 0.10                          | 2                              | Osuna-Cruz et al., (2020) |
| <i>Ulva mutabilis</i>             | U. mutabilis A         | Cold stress                          | Not available           | Not available                           | no change                     | 4                              | De Clerck et al., (2018)  |
|                                   | U. mutabilis B         | Cold stress                          | Not available           | Not available                           | 0.08                          | 8                              | De Clerck et al., (2018)  |
| <i>Acropora millepora</i>         | A. millepora A         | High CO2                             | 3453                    | 2919                                    | 0.85                          | 3                              | Moya et al., (2012)       |
|                                   | A. millepora D         | High CO2                             | 5850                    | 5102                                    | 0.87                          | 3                              | Moya et al., (2012)       |
|                                   | A. millepora E         | High CO2                             | 1999                    | 1497                                    | 0.75                          | 3                              | Moya et al., (2012)       |
|                                   | A. millepora F         | High CO2                             | 6066                    | 6202                                    | 1.02                          | 3                              | Moya et al., (2012)       |
|                                   | A. millepora I         | High CO2                             | 10976                   | 10177                                   | 0.93                          | 3                              | Moya et al., (2012)       |
|                                   | A. millepora G         | High CO2                             | 4221                    | 3400                                    | 0.81                          | 3                              | Moya et al., (2012)       |

**Table S5. DL homolog expression level and DMS concentration in surface water.**

| DLH expression data |                  |          |           |                                                                 | DMS data from Huiswar et al., 2022 |          |           |                                  |
|---------------------|------------------|----------|-----------|-----------------------------------------------------------------|------------------------------------|----------|-----------|----------------------------------|
| Tara station        | Date of sampling | Latitude | Longitude | Total DLH transcripts in all size fractions (relative abundanc) | Month                              | Latitude | Longitude | Monthly average of DMS con. (nM) |
| TARA_004            | 9/15/2009        | 36.553   | -6.567    | 1.12E-04                                                        | September                          | 37       | -7        | 2.452                            |
| TARA_007            | 9/23/2009        | 37.040   | 1.948     | 8.94E-05                                                        | September                          | 37       | 2         | 2.403                            |
| TARA_009            | 9/28/2009        | 39.124   | 5.854     | 3.15E-05                                                        | September                          | 39       | 6         | 2.482                            |
| TARA_018            | 11/2/2009        | 35.754   | 14.274    | 8.78E-05                                                        | November                           | 36       | 14        | 2.314                            |
| TARA_020            | 11/12/2009       | 34.430   | 14.998    | 1.25E-05                                                        | November                           | 34       | 15        | 2.314                            |
| TARA_022            | 11/16/2009       | 39.831   | 17.410    | 1.05E-04                                                        | November                           | 40       | 17        | 2.314                            |
| TARA_023            | 11/18/2009       | 42.190   | 17.717    | 1.25E-04                                                        | November                           | 42       | 18        | 2.314                            |
| TARA_025            | 11/23/2009       | 39.345   | 19.394    | 8.12E-05                                                        | November                           | 39       | 19        | 2.314                            |
| TARA_026            | 11/24/2009       | 38.475   | 20.171    | 4.91E-05                                                        | November                           | 38       | 20        | 2.314                            |
| TARA_030            | 12/15/2009       | 33.918   | 32.881    | 2.60E-05                                                        | December                           | 34       | 33        | 2.251                            |
| TARA_036            | 3/12/2010        | 20.819   | 63.507    | 6.72E-05                                                        | March                              | 21       | 64        | 3.168                            |
| TARA_038            | 3/15/2010        | 19.038   | 64.498    | 4.94E-05                                                        | March                              | 19       | 64        | 3.218                            |
| TARA_039            | 3/18/2010        | 18.581   | 66.567    | 8.62E-05                                                        | March                              | 19       | 67        | 3.111                            |
| TARA_040            | 3/22/2010        | 17.529   | 67.958    | 1.05E-04                                                        | March                              | 18       | 68        | 2.954                            |
| TARA_041            | 3/30/2010        | 14.574   | 69.999    | 5.22E-05                                                        | March                              | 15       | 70        | 2.816                            |
| TARA_046            | 4/15/2010        | -0.662   | 73.163    | 6.59E-05                                                        | April                              | -1       | 73        | 2.392                            |
| TARA_047            | 4/16/2010        | -2.044   | 72.161    | 3.41E-05                                                        | April                              | -2       | 72        | 2.373                            |
| TARA_048            | 4/19/2010        | -9.415   | 66.303    | 2.28E-05                                                        | April                              | -9       | 66        | 1.953                            |
| TARA_051            | 5/11/2010        | -21.485  | 54.333    | 1.25E-04                                                        | May                                | -21      | 54        | 2.817                            |
| TARA_052            | 5/17/2010        | -16.961  | 53.962    | 1.36E-04                                                        | May                                | -17      | 54        | 2.768                            |
| TARA_064            | 7/7/2010         | -29.500  | 37.991    | 1.22E-04                                                        | July                               | -30      | 38        | 3.838                            |
| TARA_065            | 7/12/2010        | -35.190  | 26.291    | 7.03E-05                                                        | July                               | -35      | 26        | 3.050                            |
| TARA_066            | 7/15/2010        | -34.931  | 17.951    | 6.02E-05                                                        | July                               | -35      | 18        | 3.115                            |
| TARA_067            | 9/7/2010         | -32.199  | 17.705    | 7.37E-05                                                        | September                          | -32      | 18        | 3.263                            |
| TARA_068            | 9/14/2010        | -31.047  | 4.667     | 9.54E-05                                                        | September                          | -31      | 5         | 1.716                            |
| TARA_070            | 9/21/2010        | -20.405  | -3.185    | 1.27E-04                                                        | September                          | -20      | -3        | 1.338                            |
| TARA_072            | 10/5/2010        | -8.750   | -17.919   | 5.83E-05                                                        | October                            | -9       | -18       | 1.715                            |
| TARA_076            | 10/16/2010       | -20.950  | -35.219   | 1.24E-04                                                        | October                            | -21      | -35       | 0.862                            |
| TARA_078            | 11/4/2010        | -30.173  | -43.284   | 1.36E-04                                                        | November                           | -30      | -43       | 1.959                            |
| TARA_080            | 11/29/2010       | -40.645  | -52.141   | 1.43E-04                                                        | November                           | -41      | -52       | 4.830                            |
| TARA_081            | 12/2/2010        | -44.579  | -52.303   | 7.58E-05                                                        | December                           | -45      | -52       | 3.174                            |
| TARA_082            | 12/6/2010        | -47.192  | -58.258   | 2.71E-04                                                        | December                           | -47      | -58       | 3.258                            |
| TARA_083            | 12/16/2010       | -54.376  | -65.113   | 1.10E-04                                                        | December                           | -54      | -65       | 2.994                            |
| TARA_084            | 1/3/2011         | -60.284  | -60.588   | 1.25E-04                                                        | January                            | -60      | -61       | 1.653                            |
| TARA_085            | 1/6/2011         | -62.074  | -49.460   | 4.53E-04                                                        | January                            | -62      | -49       | 2.357                            |
| TARA_092            | 2/26/2011        | -33.684  | -71.984   | 1.86E-04                                                        | February                           | -34      | -72       | 1.222                            |
| TARA_093            | 3/12/2011        | -34.057  | -73.103   | 5.21E-05                                                        | March                              | -34      | -73       | 2.305                            |
| TARA_098            | 4/2/2011         | -25.808  | -111.730  | 1.01E-04                                                        | April                              | -26      | -112      | 1.227                            |

|          |            |         |          |          |           |     |      |       |
|----------|------------|---------|----------|----------|-----------|-----|------|-------|
| TARA_100 | 4/14/2011  | -12.976 | -96.002  | 2.06E-04 | April     | -13 | -96  | 2.014 |
| TARA_102 | 4/21/2011  | -5.253  | -85.181  | 1.27E-04 | April     | -5  | -85  | 3.250 |
| TARA_109 | 5/12/2011  | 2.016   | -84.569  | 1.25E-04 | May       | 2   | -85  | 3.303 |
| TARA_110 | 4/14/2011  | -1.991  | -84.595  | 1.08E-04 | April     | -2  | -85  | 4.132 |
| TARA_111 | 5/31/2011  | -16.958 | -100.654 | 1.53E-04 | May       | -17 | -101 | 1.612 |
| TARA_122 | 7/26/2011  | -8.998  | -139.219 | 1.54E-04 | July      | -9  | -139 | 2.284 |
| TARA_123 | 7/31/2011  | -8.902  | -140.288 | 1.67E-04 | July      | -9  | -140 | 2.284 |
| TARA_124 | 8/4/2011   | -9.150  | -140.516 | 1.32E-04 | August    | -9  | -141 | 2.205 |
| TARA_125 | 8/8/2011   | -8.904  | -142.588 | 1.38E-04 | August    | -9  | -143 | 2.205 |
| TARA_128 | 9/4/2011   | 0.007   | -153.686 | 1.32E-04 | September | 0   | -154 | 2.459 |
| TARA_131 | 9/29/2011  | 22.741  | -157.979 | 1.84E-04 | September | 23  | -158 | 1.563 |
| TARA_132 | 10/4/2011  | 31.504  | -159.035 | 1.97E-04 | October   | 32  | -159 | 1.398 |
| TARA_135 | 10/23/2011 | 33.005  | -121.782 | 1.26E-04 | October   | 33  | -122 | 1.717 |
| TARA_136 | 11/30/2011 | 17.064  | -118.899 | 1.26E-04 | November  | 17  | -119 | 1.287 |
| TARA_137 | 12/2/2011  | 14.197  | -116.645 | 1.07E-04 | December  | 14  | -117 | 2.455 |
| TARA_138 | 12/10/2011 | 6.327   | -102.953 | 6.26E-05 | December  | 6   | -103 | 3.346 |
| TARA_139 | 12/15/2011 | 6.494   | -94.981  | 9.28E-05 | December  | 6   | -95  | 3.265 |
| TARA_142 | 1/9/2012   | 25.550  | -88.407  | 1.09E-04 | January   | 26  | -88  | 2.698 |
| TARA_143 | 1/16/2012  | 29.724  | -79.629  | 3.96E-05 | January   | 30  | -80  | 1.400 |
| TARA_144 | 1/29/2012  | 36.354  | -72.844  | 6.74E-05 | January   | 36  | -73  | 0.926 |
| TARA_145 | 2/2/2012   | 39.217  | -70.038  | 1.69E-04 | February  | 39  | -70  | 1.370 |
| TARA_146 | 2/15/2012  | 34.763  | -71.246  | 1.25E-04 | February  | 35  | -71  | 1.572 |
| TARA_147 | 2/18/2012  | 33.020  | -66.551  | 1.88E-04 | February  | 33  | -67  | 1.325 |
| TARA_148 | 2/24/2012  | 31.760  | -64.183  | 1.39E-04 | February  | 32  | -64  | 1.300 |
| TARA_149 | 3/1/2012   | 34.067  | -49.850  | 4.49E-05 | March     | 34  | -50  | 1.117 |
| TARA_150 | 3/5/2012   | 35.908  | -37.261  | 1.37E-04 | March     | 36  | -37  | 1.114 |
| TARA_151 | 3/9/2012   | 36.159  | -29.006  | 1.58E-04 | March     | 36  | -29  | 1.277 |
| TARA_152 | 3/19/2012  | 43.683  | -16.842  | 1.39E-04 | March     | 44  | -17  | 1.417 |
| TARA_155 | 5/24/2013  | 54.547  | -16.889  | 1.47E-04 | May       | 55  | -17  | 5.955 |
| TARA_158 | 6/3/2013   | 67.130  | 0.298    | 4.99E-05 | June      | 67  | 0    | 7.320 |
| TARA_163 | 6/9/2013   | 76.184  | 1.457    | 2.32E-03 | June      | 76  | 1    | 6.805 |
| TARA_168 | 7/1/2013   | 72.566  | 44.111   | 1.26E-04 | July      | 73  | 44   | 4.521 |
| TARA_173 | 7/8/2013   | 78.945  | 79.361   | 1.90E-04 | July      | 79  | 79   | 1.312 |
| TARA_175 | 7/10/2013  | 78.568  | 68.688   | 8.13E-04 | July      | 79  | 69   | 1.354 |
| TARA_178 | 7/18/2013  | 75.981  | 74.677   | 7.39E-05 | July      | 76  | 75   | 1.688 |
| TARA_180 | 7/18/2013  | 76.528  | 83.995   | 1.34E-04 | July      | 77  | 84   | 1.906 |
| TARA_188 | 8/15/2013  | 78.305  | 91.719   | 2.50E-03 | August    | 78  | 92   | 2.010 |
| TARA_189 | 8/27/2013  | 77.920  | 117.017  | 1.10E-04 | August    | 78  | 117  | 1.946 |
| TARA_191 | 9/3/2013   | 71.556  | 160.941  | 1.90E-05 | September | 72  | 161  | 0.844 |
| TARA_193 | 9/8/2013   | 71.099  | 174.928  | 6.80E-05 | September | 71  | 175  | 0.985 |
| TARA_194 | 9/11/2013  | 73.382  | -168.205 | 5.05E-05 | September | 73  | -168 | 1.535 |
| TARA_196 | 9/14/2013  | 71.907  | -154.920 | 6.12E-05 | September | 72  | -155 | 1.974 |
| TARA_201 | 9/30/2013  | 74.312  | -85.849  | 6.42E-05 | September | 74  | -86  | 0.844 |
| TARA_205 | 10/8/2013  | 72.461  | -71.892  | 8.99E-05 | October   | 72  | -72  | 0.485 |
| TARA_206 | 10/12/2013 | 70.956  | -53.576  | 9.43E-05 | October   | 71  | -54  | 0.437 |
| TARA_208 | 10/20/2013 | 69.116  | -51.550  | 8.23E-05 | October   | 69  | -52  | 0.437 |
| TARA_209 | 10/23/2013 | 64.736  | -53.060  | 1.39E-04 | October   | 65  | -53  | 0.359 |
| TARA_210 | 10/27/2013 | 61.533  | -55.992  | 1.40E-04 | October   | 62  | -56  | 0.280 |



**Dataset S1 (separate file).** DMSP lyase homologs.

**Dataset S2 (separate file).** Amino acid sequences of predicted DL homologs.

**Dataset S3 (separate file).** Species with no DL homologs identified in available databases.
